# Supplementary material for: Rapid fabrication of hydrophobic/hydrophilic patterns on paper substrates for paper spray mass spectrometry
Source: Royal Society of Chemistry journal article supplement (doi:10.1039/d3an01071f), 2023-01-01
Supplement: d3an01071f1.pdf [file d3an01071f1.pdf]

*Electronic Supplementary Information (ESI): Rapid Fabrication of Hydrophobic/Hydrophilic Patterns on Paper Substrates for Paper Spray Mass Spectrometry*

*Authors:* Austin Arias, Peyton E. Windham, Natalie A. Cheyne, and William M. Gilliland, Jr.

Figures:

|                        |    |
|------------------------|----|
| <b>Figure S1</b> ..... | 2  |
| <b>Figure S2</b> ..... | 3  |
| <b>Figure S3</b> ..... | 4  |
| <b>Figure S4</b> ..... | 5  |
| <b>Figure S5</b> ..... | 7  |
| <b>Figure S6</b> ..... | 8  |
| <b>Figure S7</b> ..... | 9  |
| <b>Figure S8</b> ..... | 10 |
| <b>Figure S9</b> ..... | 11 |

Tables:

|                       |   |
|-----------------------|---|
| <b>Table S1</b> ..... | 6 |
|-----------------------|---|

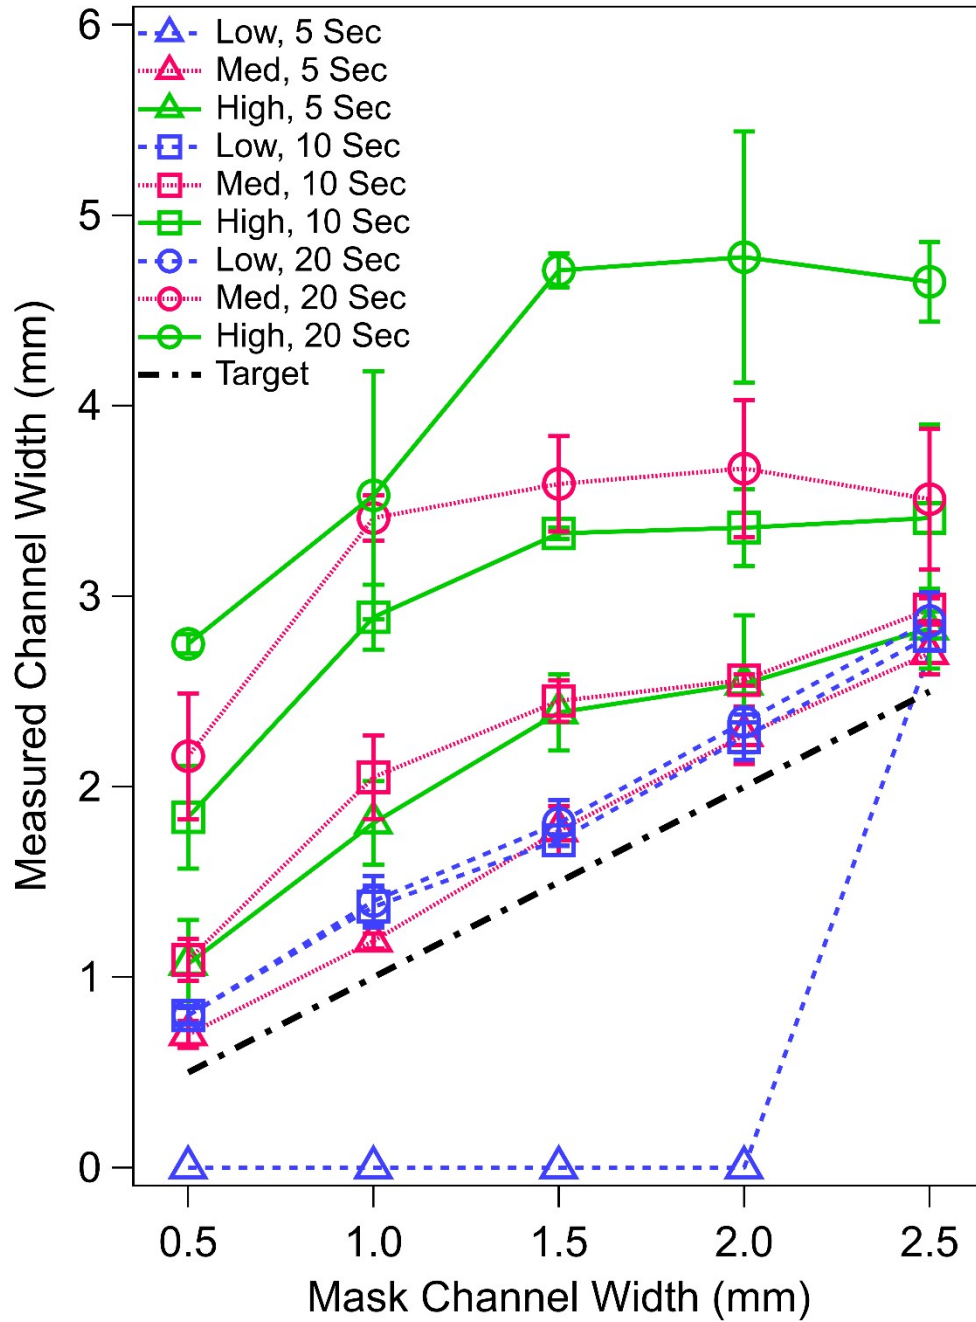

**Figure S1.** Measured channel width as a function of expected channel width for a 1-mm thick mask for 9 different oxygen plasma conditions. The dashed line indicates the predicted channel width.

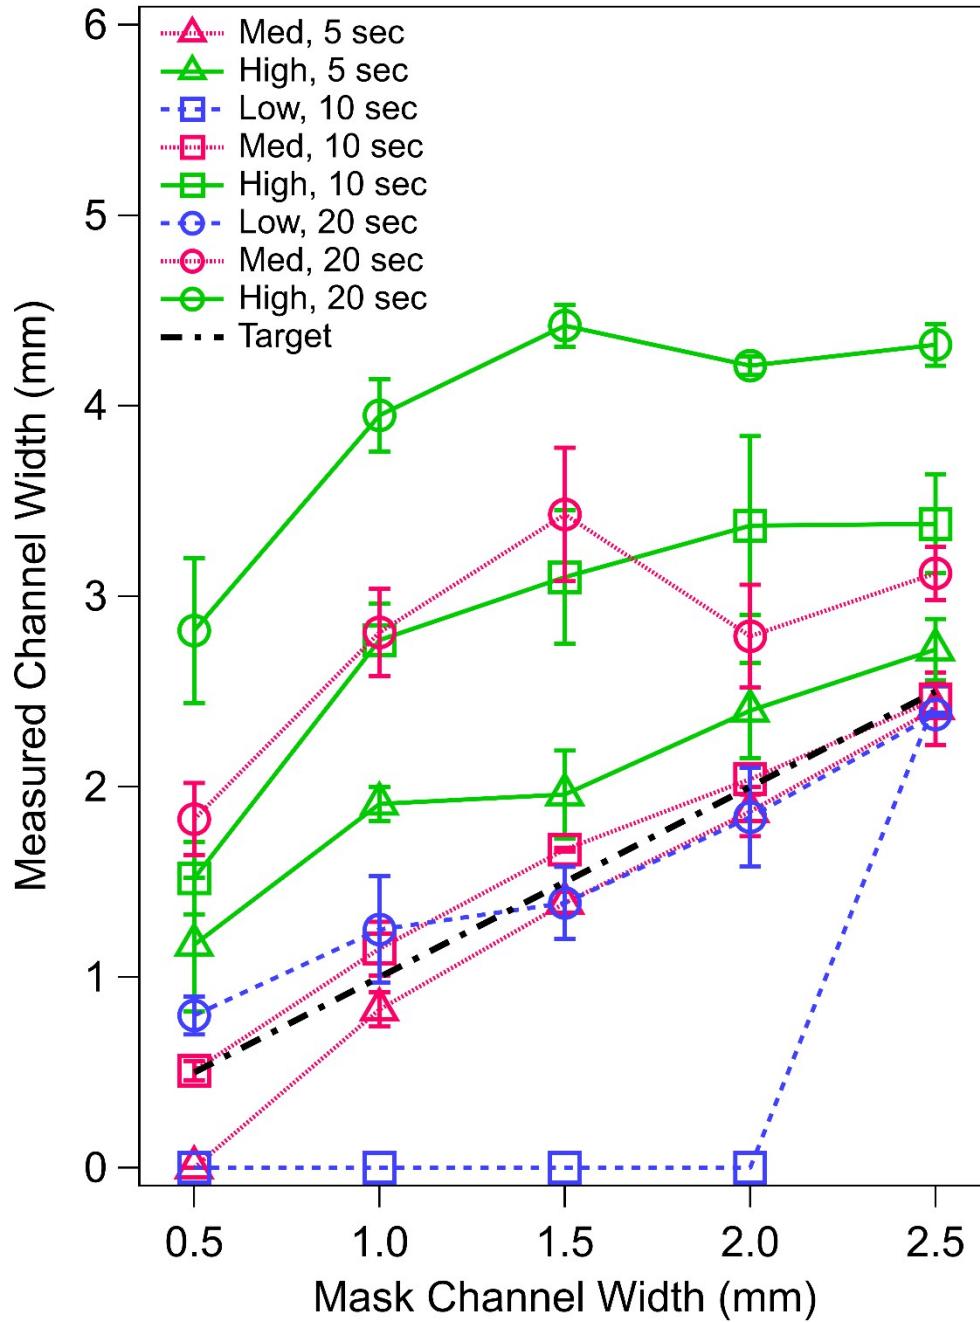

**Figure S2.** Measured channel width as a function of expected channel width for a 1.5-mm thick mask for 8 different oxygen plasma conditions. The dashed line indicates the predicted channel width. No channels were formed when the plasma cleaner was set at low for 5 seconds.

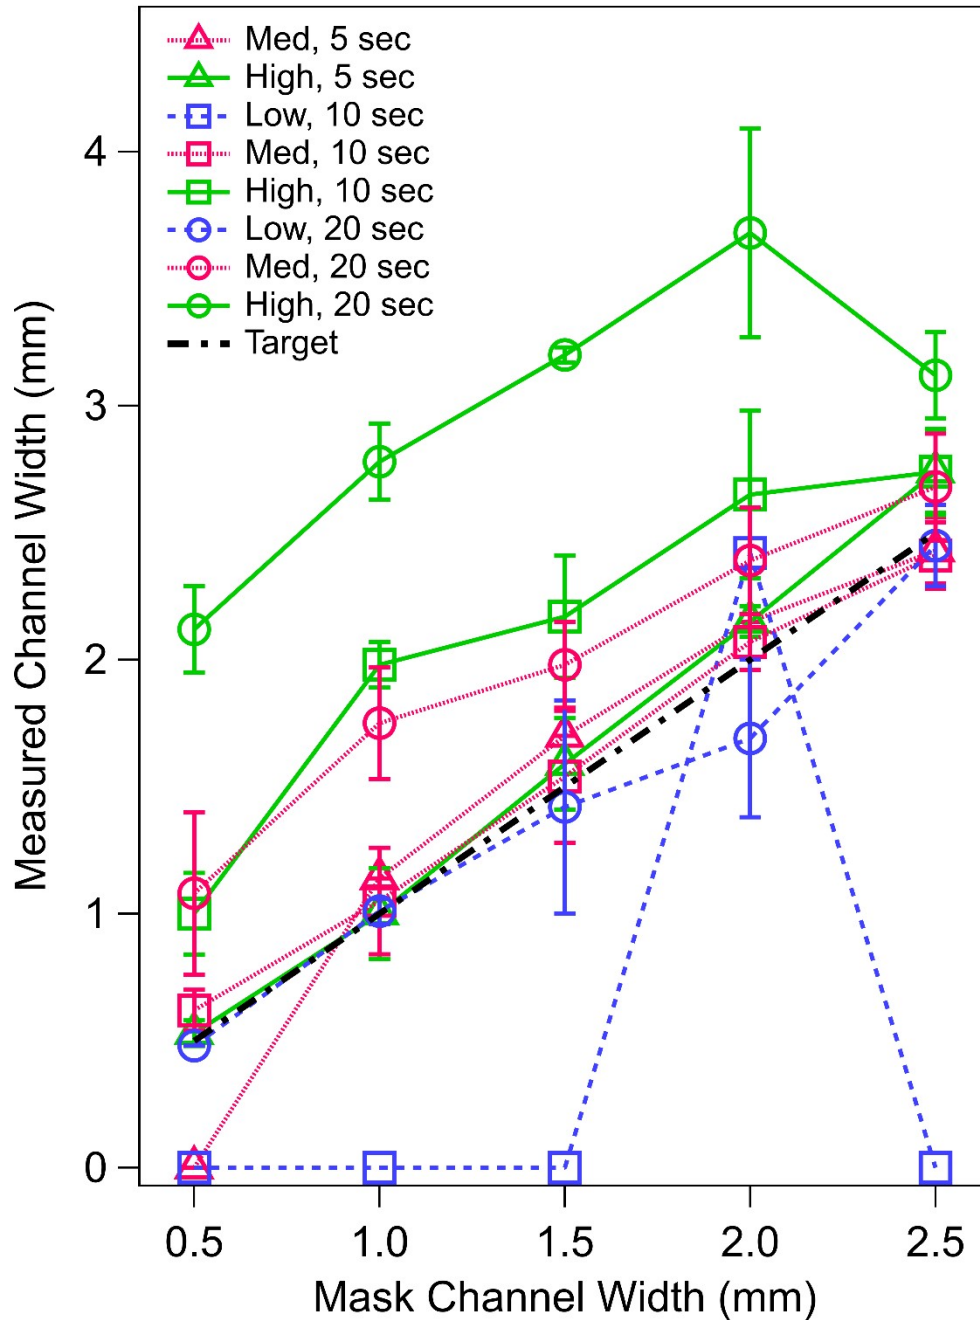

**Figure S3.** Measured channel width as a function of expected channel width for a 2.5-mm thick mask for 8 different oxygen plasma conditions. The dashed line indicates the predicted channel width. No channels were formed when the plasma cleaner was set at low for 5 seconds.

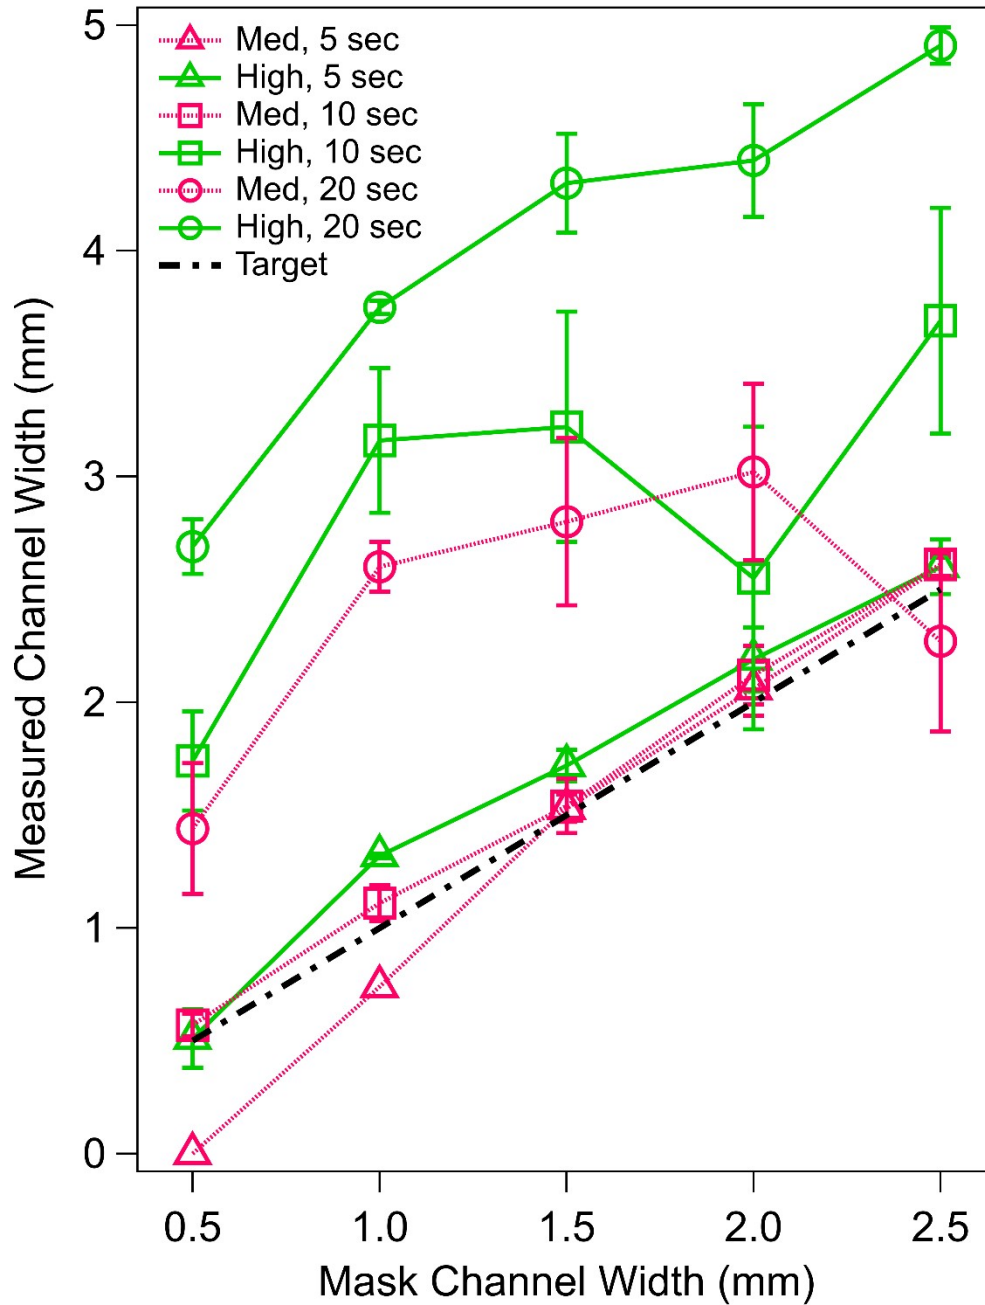

**Figure S4.** Measured channel width as a function of expected channel width for a 3-mm thick mask for 6 different oxygen plasma conditions. The dashed line indicates the predicted channel width. No channels were formed at low intensity.

**Table S1.** Optimum oxygen/plasma patterning parameters for each channel width.

| <u>Channel<br/>Width (mm)</u> | <u>Mask<br/>Thickness (mm)</u> | <u>Intensity (s)</u> | <u>Time (s)</u> |
|-------------------------------|--------------------------------|----------------------|-----------------|
| 0.5                           | 1.5                            | low                  | 12              |
| 1                             | 2.5                            | low                  | 20              |
| 1.5                           | 3                              | low                  | 15              |
| 2                             | 1.5                            | low                  | 15              |
| 2.5                           | 1.5                            | low                  | 7               |

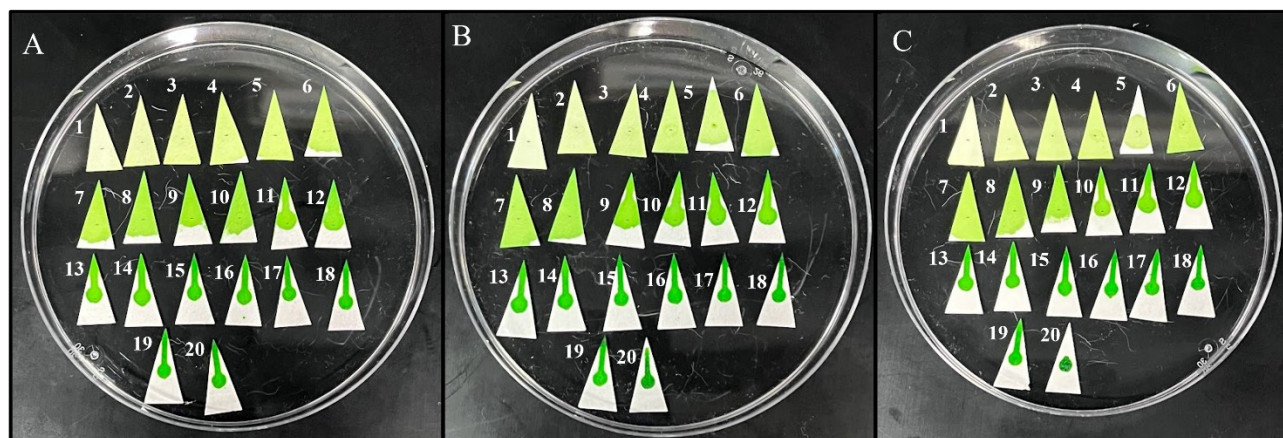

**Figure S5.** Pictures of patterned paper substrates with 1-mm wide channels with A) solvent spotted immediately after mixing, B) solvent left overnight at room temperature, and C) solvent refrigerated overnight at 4 °C. The solvent composition is increasing in aqueous content from 95% Methanol/5% aqueous (1) to 100% aqueous (20) in 5% increments. Triangle 10 in each picture is 50% methanol/50% aqueous. The dye was water soluble and was added to DI water before mixing with methanol.

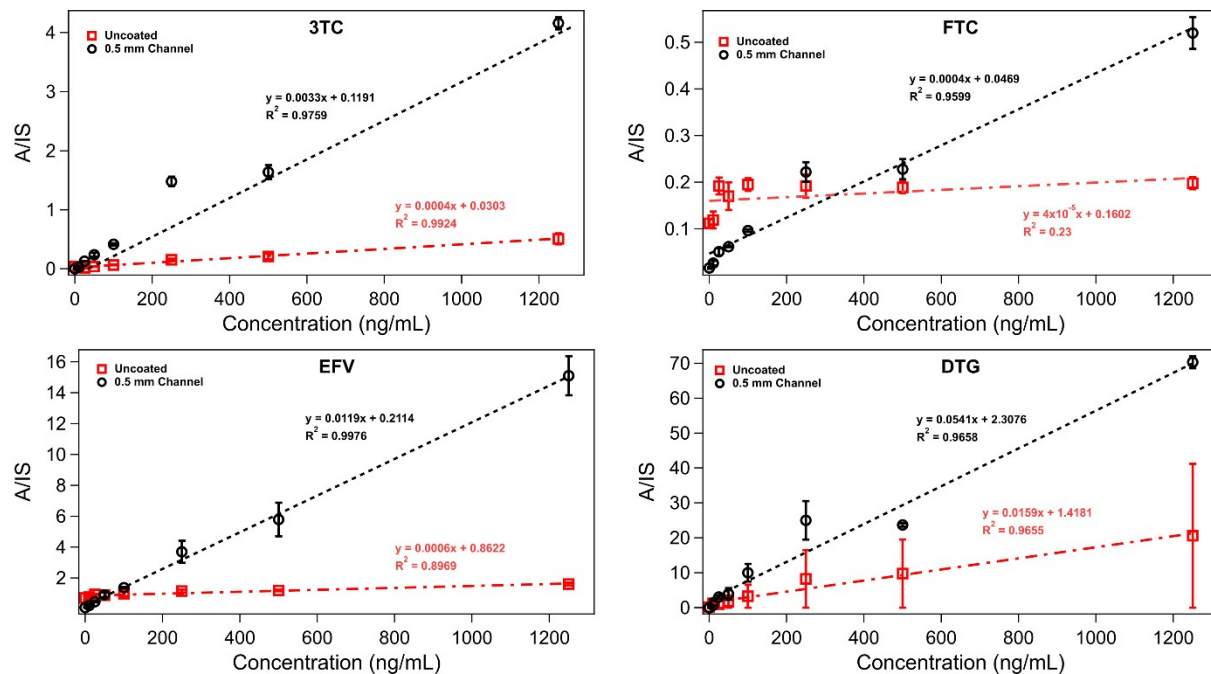

**Figure S6.** Calibration curves for uncoated (red squares) and patterned papers with 0.5-mm channels (black circles) for four target antiretrovirals. The error bars represent the standard error of 3 measurements.



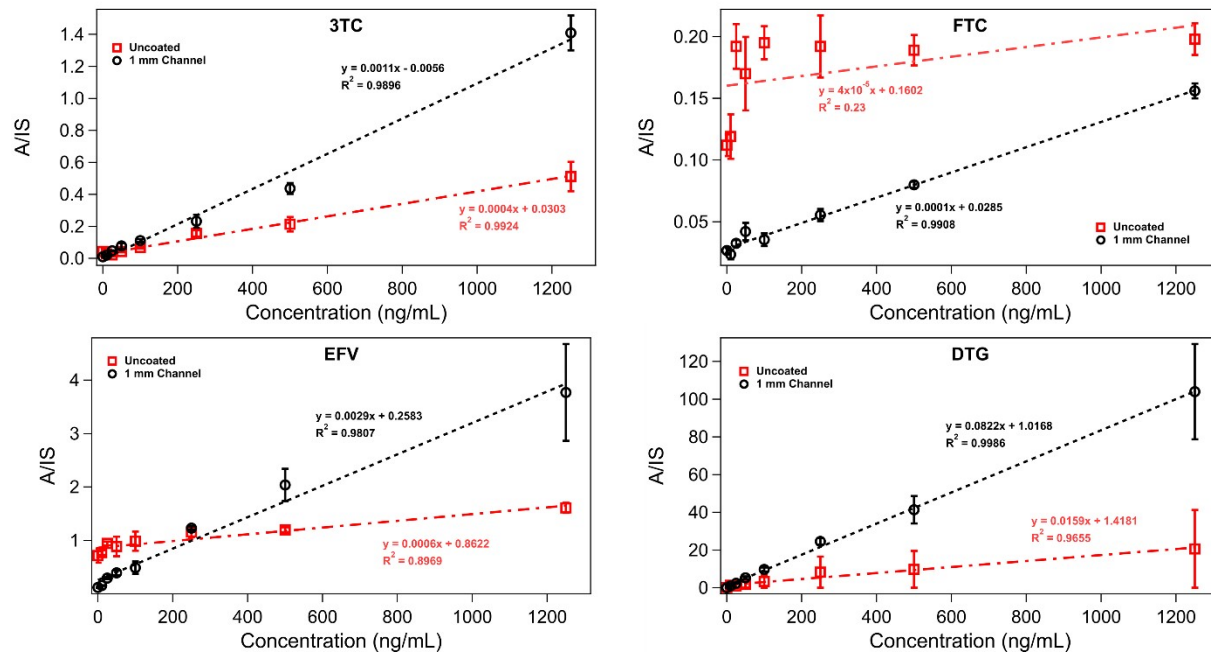

**Figure S7.** Calibration curves for uncoated (red squares) and patterned papers with 1-mm channels (black circles) for four target antiretrovirals. The error bars represent the standard error of 3 measurements.

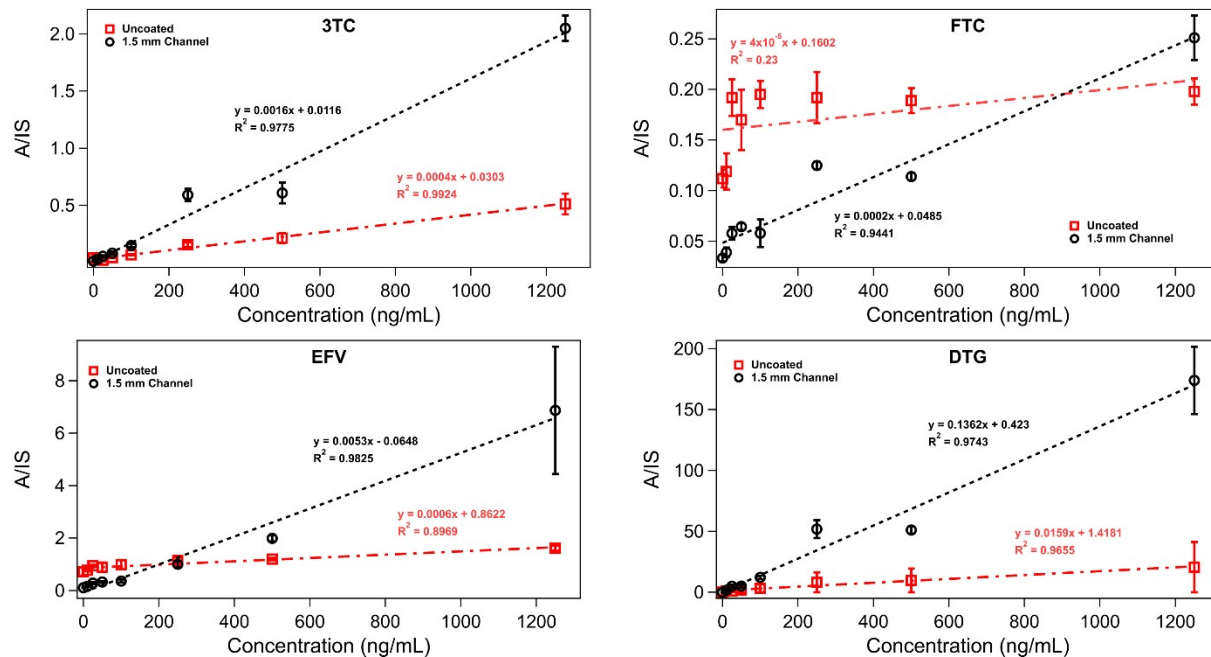

**Figure S8.** Calibration curves for uncoated (red squares) and patterned papers with 1.5-mm channels (black circles) for four target antiretrovirals. The error bars represent the standard error of 3 measurements.

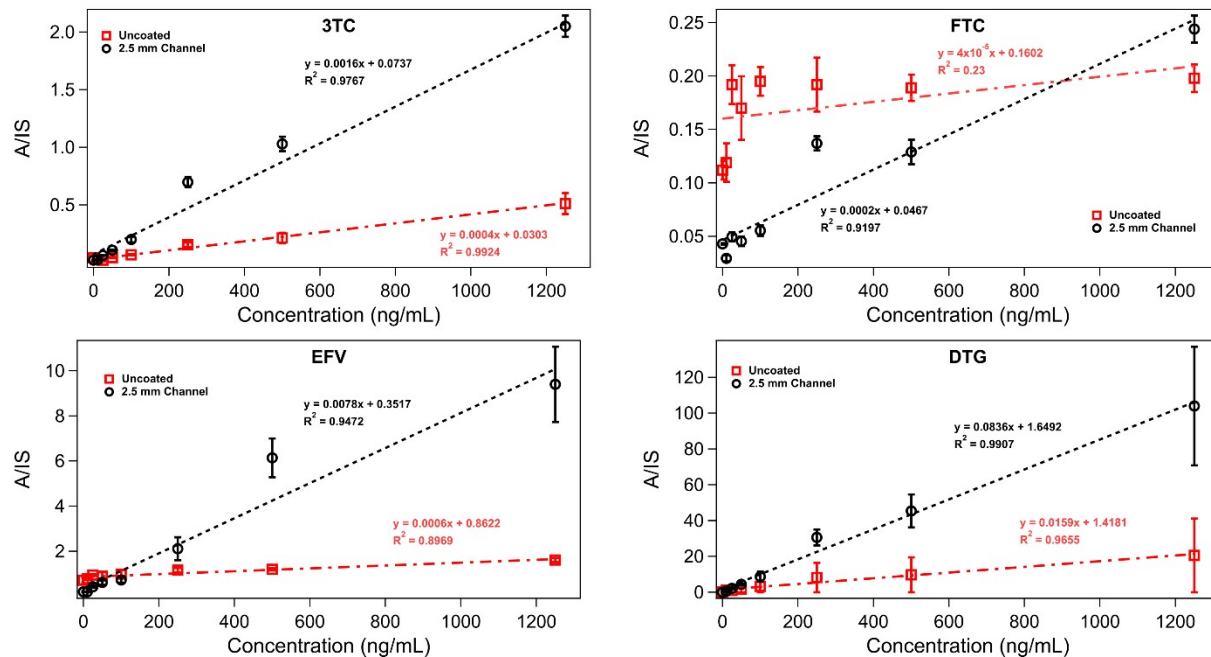

**Figure S9.** Calibration curves for uncoated (red squares) and patterned papers with 0.5-mm channels (black circles) for four target antiretrovirals. The error bars represent the standard error of 3 measurements.
